# Supplementary material for: Duurzame inzetbaarheid van de urologische beroepsgroep onder druk
Source: Springer Nature journal article supplement (doi:10.1007/s13629-023-00379-0), 2023-02-01
Supplement: MOESM1 [file 23981766]

# Vragenlijst

## Evaluatie duurzame inzetbaarheid urologen en urologen in opleiding

### Demografie

1. Wat is uw leeftijd?

- < 25 jaar
- 25-29 jaar
- 30-34 jaar
- 35-39 jaar
- 40-44 jaar
- 45-49 jaar
- 50-54 jaar
- 55-59 jaar
- 60-65 jaar
- > 65 jaar

2. Wat is uw geslacht?

- man
- vrouw

3. Wat is uw functie?

- AIOS, opleidingsjaar ...
- uroloog sinds ...
- niet meer praktiserend sinds ...

4. Waar bent u werkzaam?

- academisch ziekenhuis
- topklinisch ziekenhuis
- algemeen ziekenhuis
- zelfstandig behandelcentrum

5. Werkt u in loondienst of in vrije vestiging?

- loondienst
- vrije vestiging
- overige (geef nadere toelichting)

6. Werkt u fulltime of parttime?

- Fulltime, aantal uren ...
- Parttime, aantal uren ...

7. Wat is uw woonsituatie?

- gehuwd of samenwonend zonder thuiswonende kinderen
- gehuwd of samenwonend met thuiswonende kinderen
- één-ouder-huishouden
- alleenstaand
- overige (geef nadere toelichting)

8. Als u kinderen hebt, in welke leeftijdscategorie valt/vallen uw kind(-eren)? (meerdere antwoorden mogelijk)

- 0-12 jaar
- 13-21 jaar
- 22 jaar en ouder
- geen kinderen

### **Werktevredenheid**

9. Ik ben tevreden met mijn werk

- helemaal niet mee eens
- niet mee eens
- neutraal
- mee eens
- helemaal mee eens

10. Ik zoek uitdaging naast mijn klinische werkzaamheden (bijv. onderwijs, onderzoek, bestuurlijke taken)

- helemaal niet mee eens
- niet mee eens
- neutraal
- mee eens
- helemaal mee eens

11. Er is vanuit mijn vakgroep voldoende aandacht voor periodieke evaluatie van werktevredenheid

- helemaal niet mee eens
- niet mee eens
- neutraal
- mee eens
- helemaal mee eens

### **Bevlogenheid**

12. Als ik werk voel ik me fit en sterk

- helemaal niet mee eens
- niet mee eens
- neutraal
- mee eens
- helemaal mee eens

13. Ik ben enthousiast over mijn baan

- helemaal niet mee eens
- niet mee eens
- neutraal
- mee eens
- helemaal mee eens

14. Ik ga helemaal op in mijn werk

- helemaal niet mee eens
- niet mee eens
- neutraal
- mee eens
- helemaal mee eens

## **Arbeidsvermogen**

15. Ik kan makkelijk voldoen aan de fysieke eisen die mijn werk aan mij stelt

- helemaal niet mee eens
- niet mee eens
- mee eens
- helemaal mee eens

16. Ik kan makkelijk voldoen aan de psychische eisen die mijn werk aan mij stelt

- helemaal niet mee eens
- niet mee eens
- mee eens
- helemaal mee eens

## **Burn-out**

17. Bent u wel eens tijdelijk minder gaan werken en/of gestopt met werken vanwege tekenen van burn-out?

- Ja
- Nee

18. Wat was de oorzaak?

- balans werk-privé
- te hoge werkdruk
- te veel life events zoals kinderen krijgen, zwangerschap of verhuizing
- persoonlijke eigenschappen, zoals perfectionisme
- overige, (geef nadere toelichting) ...

19. Er is binnen mijn vakgroep voldoende aandacht voor preventie van burn-out

- helemaal niet mee eens
- niet mee eens
- neutraal
- mee eens
- helemaal mee eens

20. Op het werk voel ik me geestelijk uitgeput

- helemaal niet mee eens
- niet mee eens
- neutraal
- mee eens
- helemaal mee eens

21. Ik raak maar niet uitgerust nadat ik gewerkt heb

- helemaal niet mee eens
- niet mee eens
- neutraal
- mee eens
- helemaal mee eens

22. Op het werk voel ik me lichamelijk uitgeput

- helemaal niet mee eens

- niet mee eens
- neutraal
- mee eens
- helemaal mee eens

### **Werkdruk**

23. Hoe ervaart u de huidige werkdruk?

- veel te hoog
- te hoog
- goed
- te laag
- veel te laag

24. Ik kan de werklust nog zeer goed aan

- helemaal niet mee eens
- niet mee eens
- neutraal
- mee eens
- helemaal mee eens

25. Ik voel me vaak overbelast

- helemaal niet mee eens
- niet mee eens
- neutraal
- mee eens
- helemaal mee eens

26. Ik denk aan het stoppen met mijn opleiding/werken als uroloog

- helemaal niet mee eens
- niet mee eens
- neutraal
- mee eens
- helemaal mee eens

27. Als u denkt aan stoppen, wat is dan de reden?

- verstoorde werk-privé balans
- de cultuur in de zorg
- slechte arbeidsperspectieven
- gebrek aan autonomie
- administratieve last
- overige, (geef nadere toelichting) ...

## **Presteren**

*Presteren gaat over de mate waarin iemand voldoet aan overeengekomen verplichtingen.*

28. Ik behaal alle doelen (werkopdrachten) die bij mijn werk horen

- helemaal niet mee eens
- niet mee eens
- neutraal
- mee eens
- helemaal mee eens

29. De taken die bij mijn werk horen, gaan me goed af

- helemaal niet mee eens
- niet mee eens
- neutraal
- mee eens
- helemaal mee eens

30. Ik presteer goed in mijn werk

- helemaal niet mee eens
- niet mee eens
- neutraal
- mee eens
- helemaal mee eens

## **Arbeidsmarkt: instroom**

31. Als jonge klare zijn er voldoende banen die aansluiten bij mijn profiel (aandachtsgebied, fte, locatie)

- helemaal niet mee eens
- niet mee eens
- neutraal
- mee eens
- helemaal mee eens

32. Vacatures zouden veel eerder voor de werkelijke datum uitgezet moeten worden om het proces van instroom en uitstroom te versoepelen

- helemaal niet mee eens
- niet mee eens
- neutraal
- mee eens
- helemaal mee eens

## **Arbeidsmarkt: doorstroom**

33. Ik mis ondersteuning van collega's om diensten of commissies over te nemen

- helemaal niet mee eens
- niet mee eens
- neutraal
- mee eens
- helemaal mee eens

34. Ik zou minder uren willen werken

- helemaal niet mee eens
- niet mee eens
- neutraal
- mee eens
- helemaal mee eens

**Arbeidsmarkt: uitstroom**

35. Ik mis maatregelen om mij tot op hogere leeftijd gezond aan het werk te houden

- helemaal niet mee eens
- niet mee eens
- neutraal
- mee eens
- helemaal mee eens

36. Ik ben geïnteresseerd in maatregelen over een geleidelijke afbouw van mijn werkzaamheden na mijn 60<sup>e</sup>

- helemaal niet mee eens
- niet mee eens
- neutraal
- mee eens
- helemaal mee eens

37. Ik zou na mijn 60e willen stoppen met diensten

- helemaal niet mee eens
- niet mee eens
- neutraal
- mee eens
- helemaal mee eens

38. Ik zou na mijn 60e minder uren willen werken

- helemaal niet mee eens
- niet mee eens
- neutraal
- mee eens
- helemaal mee eens

39. Indien mogelijk, wil ik parttime gaan werken voor

- 50-60%
- 70-80%
- >80%
- Niet van toepassing

40. Ik zou na mijn 60e willen veranderen van taken

- helemaal niet mee eens
- niet mee eens
- neutraal
- mee eens
- helemaal mee eens

41. Ik zou, om een goede instroom mogelijk te maken, genoeg nemen met een (beperkte) afname van mijn inkomen

- helemaal niet mee eens
- niet mee eens
- neutraal
- mee eens
- helemaal mee eens

**Afsluitend**

42. Wat voor rapportcijfer geeft u uw leven?

- 1-10

43. Heeft u nog opmerkingen of suggesties voor ons?

....
